# Supplementary material
Source: PubMed Central journal article supplement (PMC4136099)
Supplement: AEM.00793-14_zam999105611so1.pdf [file AEM.00793-14_zam999105611so1.pdf]

1 **Supplemental Material**

2 **Flow cytometry and Real-Time qPCR as tools for assessing plasmid persistence**

3  
4 Wesley Loftie-Eaton<sup>1, 2</sup>, Allison Tucker<sup>2, 3, 4</sup>, Ann Norton<sup>2</sup> and Eva M. Top<sup>1, 2, 3, \*</sup>

5  
6 <sup>1</sup>Department of Biological Sciences, <sup>2</sup>Institute for Bioinformatics and Evolutionary Studies  
7 (IBEST), <sup>3</sup>Bioinformatics and Computational Biology Program, <sup>4</sup>Departments of  
8 Mathematics and Statistics; University of Idaho,

## 24 **Supplementary methods**

### 25 *Calculation of plasmid loss rate*

26 The rate of decline of plasmid-bearing cells within a population, or ‘plasmid loss  
27 rate’, in each assay was calculated using a logistic regression model, adapted from Hughes  
28 *et al.* (1), as described below:

$$Y_{ikl} \sim \text{BIN}(\pi_{ikl}, n_{ikl}),$$
$$\text{logit}(\pi_{ikl}) = \frac{\pi_{ikl}}{1 - \pi_{ikl}} = \alpha_i + \beta_i 10k + \gamma_{ikl},$$
$$i = 1, \dots, 5, k = 0, \dots, K, l = 1, \dots, 3$$
$$\alpha_i \sim N(0, 1000),$$
$$\beta_i \sim N(0, 1000),$$
$$\gamma_{ikl} \sim N(0, \sigma_\gamma)$$

29  
30 Here,  $i$  is an identifier of the sampling technique,  $k$  represents the day of  
31 observation, and  $l$  denotes three replicate stability assays. The observed counts of plasmid-  
32 containing bacteria,  $Y_{ikl}$ , were assumed to follow a binomial distribution (BIN) with the  
33 expected proportion of plasmid free cells equal to  $\pi_{ikl}$  and sample size equal to  $n_{ikl}$ .  $\alpha_i$  and  $\beta_i$   
34 represent the intercept and slope of the linear model, respectively, per sampling technique  
35  $i$  and were assumed to be normally distributed. The parameter  $\gamma_{ikl}$  was added to capture  
36 variation in sampling not accounted for by the binomial model (overdispersion). The  
37 distribution of the standard deviation  $\sigma_\gamma$  was assumed to be uniform with an upper bound  
38 of 100.

39 Intercepts of the presented model provide an indicator of the initial proportion of  
40 cells in the population without a plasmid at time zero. The slopes provide an indicator of  
41 the rate of plasmid loss over time. Due to the nonlinear nature of this rate, to compare the

42 different analysis methods the maximum rate of change, occurring at the time where the  
43 plasmid-bearing fraction of the population was 50%, was used. This is equivalent to  $\beta_i/4$ .  
44 Stability (or instability) was determined by the magnitude of this value – the more negative  
45 the value, the less stable the plasmid.

46 Markov Chain Monte Carlo (MCMC) was used to implement the model, specifically  
47 using a Gibbs sampler (2), as implemented in JAGS (3). Three parallel chains were run for  
48 1,000,000 iterations, discarding the first 900,000 as burn in. Samples were taken every  
49 100<sup>th</sup> iteration to overcome possible autocorrelation. From this target posterior  
50 distribution dataset 30 points were sampled at random without replacement to calculate  
51 and compare the mean maximum loss rate. Convergence was assessed using the Gelman-  
52 Rubin diagnostic (4). Computation was done using R (R Development Core Team, 2012.  
53 <http://www.R-project.org/>) utilizing the package rjags (M. Plummer. 2011. [http://CRAN.R-](http://CRAN.R-project.org/package=rjags)  
54 [project.org/package=rjags](http://CRAN.R-project.org/package=rjags)) for interface with JAGS and coda (5) for diagnostics.

55

56

57

58

59

60

61

62

63

64

65 **Supplementary Figures**

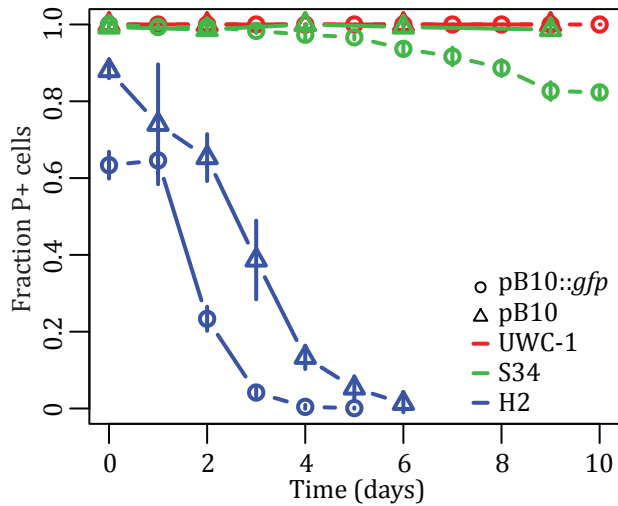

66

67 FIG. S1. Comparison of the persistence of pB10::gfp to wild type pB10 (6) in *P. putida* UWC-  
68 1, *P. veronii* S34 and *P. putida* H2 using the PC method. Note that in strain S34, the fraction  
69 of cells with wild type plasmid also eventually declined after 10 days (6). P+, plasmid-  
70 containing cells.

71

72

73

74

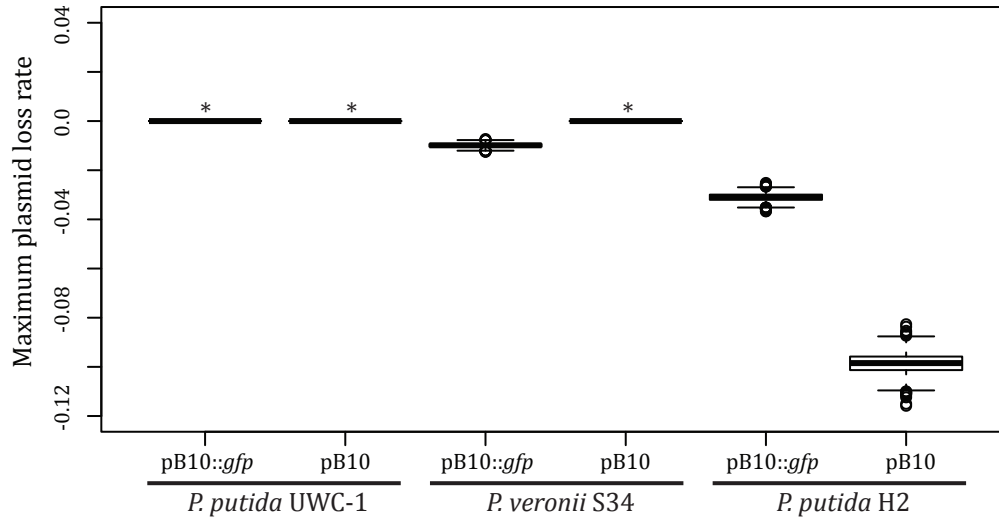

75

76 FIG. S2. Maximum plasmid loss rates (per generation) for pB10::gfp and wild type pB10 in  
 77 the three hosts. \* In *P. putida* UWC-1 no plasmid loss was observed, while in *P. veronii* S34  
 78 pB10 was reported to be only sporadically lost during the first 10 days of the persistence  
 79 assay, with plasmid-containing cells varying at a fraction between 0.98 and 1.0 during this  
 80 time (6). Therefore the maximum loss rate for these three strains was regarded as zero.

81

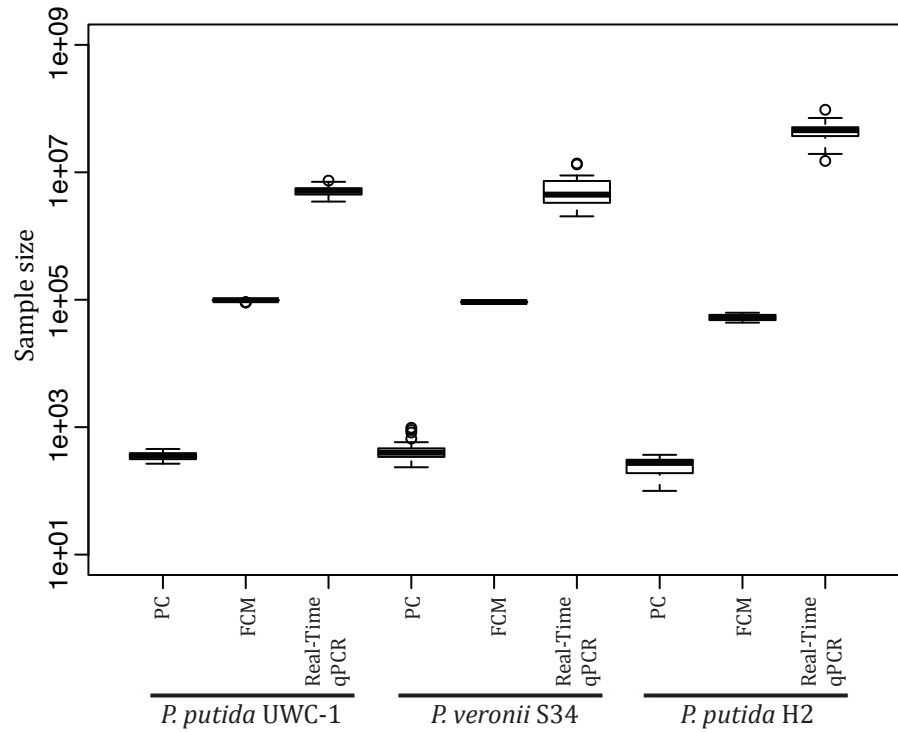

82

83 FIG. S3. Average sample size across all time points for each persistence assay. For PC  
 84 sample size refers to the number of colonies screened, for FCM it refers to the number of  
 85 events interrogated within the SSC-FSC-gated population and for Real-Time qPCR it is the  
 86 number of chromosomes that were present in each Real-Time qPCR reaction.

87

88

89

90

91

92

93

94

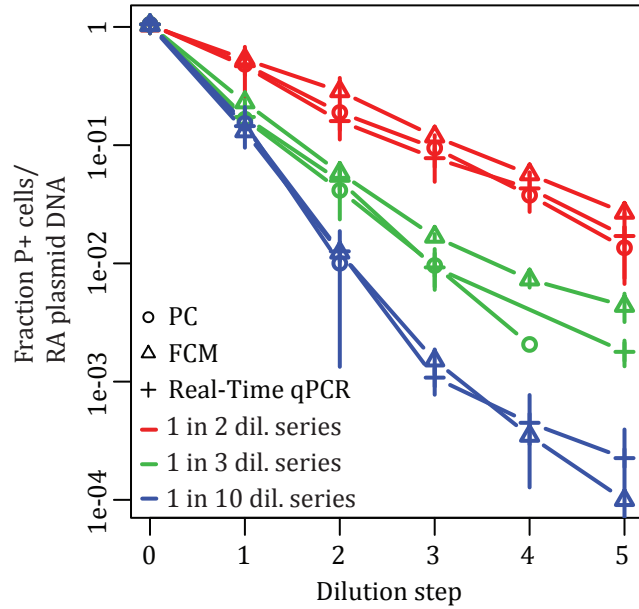

95

96 FIG. S4. Artificial plasmid stability assays consisting of known ratios of plasmid-containing  
 97 and -free *P. putida* UWC-1 cells and measured by PC, FCM and real-Time qPCR. Different  
 98 plasmid loss rates were achieved by diluting plasmid-containing cells into plasmid-free  
 99 cells following a 1 in 2, 1 in 3 and 1 in 10 dilution series. Each dilution series was repeated  
 100 in triplicate. Data are the same as in Fig. 5 but here fractions are plotted on a logarithmic  
 101 scale. P+, plasmid-containing; RA, relative abundance.

102

103

104

105

106

107

108

109

110 **Supplementary Tables**

**Table S1 ANOVA\* comparisons of the maximum loss rates across the three different techniques for each of the persistence assays.**

|                                            | df | sum sq   | mean sq  | f        | p      | Significant |
|--------------------------------------------|----|----------|----------|----------|--------|-------------|
| <i>P. putida</i> UWC1 (pB10:: <i>gfp</i> ) | 2  | 5.43E-05 | 2.71E-05 | 4.04E+02 | <0.001 | Yes         |
| <i>P. veronii</i> S34 (pB10:: <i>gfp</i> ) | 2  | 2.24E-03 | 1.12E-03 | 1.23E+03 | <0.001 | Yes         |
| <i>P. putida</i> H2 (pB10:: <i>gfp</i> )   | 2  | 6.70E-03 | 3.35E-03 | 5.26E+02 | <0.001 | Yes         |
| 1 in 2 dil. series                         | 2  | 8.14E-04 | 4.07E-04 | 1.44E+02 | <0.001 | Yes         |
| 1 in 3 dil. series                         | 2  | 1.72E-02 | 8.60E-03 | 3.07E+02 | <0.001 | Yes         |
| 1 in 10 dil. series                        | 2  | 1.11E-02 | 5.55E-03 | 2.15E+01 | <0.001 | Yes         |

\* Pairwise t-test; where df is the degrees of freedom, sum sq is the sum of the squares, mean sq is the mean of the squares, f is the f-statistic and p is the probability that the null hypothesis is true

111

**Table S2 ANOVA\* comparisons of the maximum loss rates across the three different dilution series for each of the three techniques.**

|                | df | sum sq | mean sq | f     | p      | Significant |
|----------------|----|--------|---------|-------|--------|-------------|
| PC             | 2  | 0.2261 | 0.1131  | 676.2 | <0.001 | Yes         |
| FCM            | 2  | 0.1604 | 0.0802  | 1828  | <0.001 | Yes         |
| Real-Time qPCR | 2  | 0.1846 | 0.0923  | 1177  | <0.001 | Yes         |

\* Pairwise t-test; where df is the degrees of freedom, sum sq is the sum of the squares, mean sq is the mean of the squares, f is the f-statistic and p is the probability that the null hypothesis is true

**Table S3 Comparison of variance\* in the maximum loss rate calculated from the data gathered using each of the three techniques.**

| Dilution | Comparison  | f      | p       | Result       |
|----------|-------------|--------|---------|--------------|
| 1 in 2   | PC vs FCM   | 1.1466 | 0.7151  | Similar      |
|          | PC vs qPCR  | 0.9765 | 0.9495  | Similar      |
|          | FCM vs qPCR | 0.8517 | 0.6685  | Similar      |
| 1 in 3   | PC vs FCM   | 1.9203 | 0.08419 | Similar      |
|          | PC vs qPCR  | 1.0142 | 0.9699  | Similar      |
|          | FCM vs qPCR | 0.5281 | 0.091   | Similar      |
| 1 in 10  | PC vs FCM   | 4.1659 | <0.001  | FCM smaller  |
|          | PC vs qPCR  | 2.3356 | 0.02561 | qPCR smaller |
|          | FCM vs qPCR | 0.5606 | 0.125   | Similar      |

\* F test; f is the f-statistic and p is the probability that the null hypothesis is true

112

113



114 **Supplementary References**

115

- 116 1. **Hughes, J. M., B. K. Lohman, G. E. Deckert, E. P. Nichols, M. Settles, Z. Abdo, and E.**  
117 **M. Top.** 2012. The role of clonal interference in the evolutionary dynamics of plasmid-  
118 host adaptation. *MBio* **3(4)**:e00077-12.
- 119 2. **Geman, S., and D. Geman.** 1984. Stochastic relaxation, Gibbs distributions, and the  
120 bayesian restoration of images. *IEEE Trans Pattern Anal Mach Intell* **6(6)**:721-741.
- 121 3. **Plummer, M.** 2003. JAGS: A program for analysis of Bayesian graphical models using  
122 Gibbs sampling. *Proceedings of the 3rd International Workshop on Distributed Statistical*  
123 *Computing.*
- 124 4. **Geweke, J.** 1992. Evaluating the accuracy of sampling-based approaches to calculating  
125 posterior moments, Bernardo, J. M., J. O. Berger, A. P. Dawid, and A. F. M. Smith (eds.),  
126 *Bayesian Statistics 4*, Oxford University Press, Oxford UK.
- 127 5. **Plummer, M., Best, N., Cowles, K. and K. Vines.** 2006. *R News* 6: 7-11.
- 128 6. **De Gelder, L., J. M. Ponciano, P. Joyce, and E. M. Top.** 2007. Stability of a promiscuous  
129 plasmid in different hosts: no guarantee for a long-term relationship. *Microbiol*  
130 **153(2)**:452-463.
